# Supplementary material for: Microwave spectroscopic and theoretical investigations of the strongly hydrogen bonded hexafluoroisopropanol⋯water complex
Source: Royal Society of Chemistry journal article supplement (doi:10.1039/c5cp03585f), 2015-01-01
Supplement: c5cp03585f1.pdf [file c5cp03585f1.pdf]

## Microwave Spectrum of the Strongly Hydrogen Bonded Hexafluoroisopropanol•••Water Complex

A. Shahi, E. Arunan

### Supporting Information

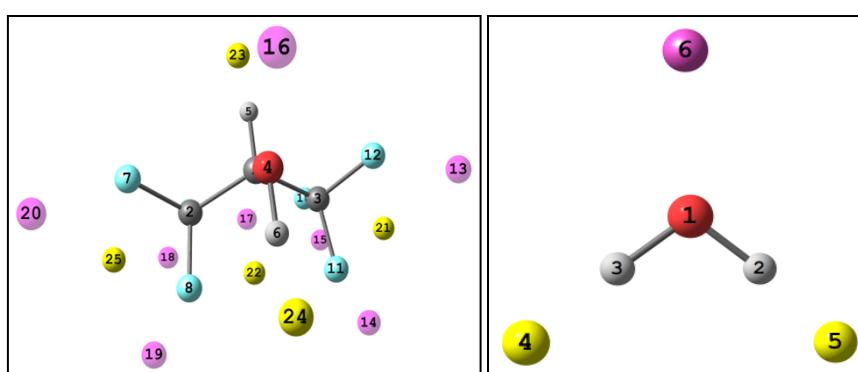

**Figure S1.** ESP minima (pink spheres) and maxima (yellow spheres) are shown for HFIP (left) and water (right). Coordinate of these molecules and the maxima/minima points are given in the Table S1-S4.

**Table S1.** ESP maxima and minima for HFIP at LC-wPBE/6-311++G\*. Starred points are the extreme values in the set of maxima or minima.

| ESP maxima and minima values for HFIP |           |        |       |       |       |
|---------------------------------------|-----------|--------|-------|-------|-------|
| Number of surface minima: 8           |           |        |       |       |       |
|                                       | # (label) | kJ/mol | X (Å) | Y (Å) | Z (Å) |
|                                       | 13        | -27.17 | -3.91 | 0.66  | -0.15 |
|                                       | 14        | -23.41 | -2.25 | -0.97 | 2.36  |
| *                                     | 15        | -25.50 | -1.94 | -2.76 | 0.46  |
|                                       | 16        | -78.17 | -0.05 | 3.33  | -1.23 |
|                                       | 17        | -28.84 | -0.07 | -2.63 | -0.22 |
|                                       | 18        | -25.50 | 1.97  | -2.76 | 0.44  |
|                                       | 19        | -23.41 | 2.25  | -0.96 | 2.37  |
|                                       | 20        | -27.17 | 3.87  | 0.81  | -0.10 |
| Number of surface maxima: 5           |           |        |       |       |       |
|                                       | 21        | 62.7   | -2.90 | -0.93 | 0.56  |
|                                       | 22        | 84.02  | 0.03  | -1.37 | 1.10  |
|                                       | 23        | 149.64 | 0.05  | 0.15  | -2.88 |
| *                                     | 24        | 235.75 | -0.07 | 2.28  | 1.90  |
|                                       | 25        | 62.28  | 2.92  | -0.91 | 0.55  |

**Table S2.** ESP maxima and minima for water at LC-wPBE/6-311++G\*\*. Starred points are the extreme values in the set of maxima or minima.

| ESP maxima and minima values for Water |           |         |       |       |       |
|----------------------------------------|-----------|---------|-------|-------|-------|
| Number of surface minima: 1            |           |         |       |       |       |
|                                        | # (label) | kJ/mol  | X (Å) | Y (Å) | Z (Å) |
| *                                      | 6         | -160.51 | -0.05 | 1.96  | 0.05  |
| Number of surface maxima: 2            |           |         |       |       |       |
| *                                      | 4         | 191.86  | -1.68 | -1.25 | 0.03  |
|                                        | 5         | 191.44  | 1.62  | -1.31 | -0.04 |

**Table S3.** Coordinate of HFIP at LC-wPBE/6-311++G\*\*

| Coordinate of the HFIP molecule |       |       |       |  |
|---------------------------------|-------|-------|-------|--|
| Atoms                           | X (Å) | Y (Å) | Z (Å) |  |
| C                               | 0.00  | 0.52  | -0.53 |  |
| C                               | 1.29  | -0.15 | -0.04 |  |
| C                               | -1.29 | -0.15 | -0.04 |  |
| O                               | 0.00  | 1.86  | -0.18 |  |
| H                               | 0.00  | 0.46  | -1.62 |  |
| H                               | 0.00  | 1.95  | 0.78  |  |
| F                               | 2.34  | 0.44  | -0.61 |  |
| F                               | 1.42  | -0.02 | 1.29  |  |
| F                               | 1.33  | -1.45 | -0.34 |  |
| F                               | -1.33 | -1.45 | -0.34 |  |
| F                               | -1.42 | -0.02 | 1.29  |  |
| F                               | -2.34 | 0.44  | -0.61 |  |

**Table S4.** Coordinate of the water molecule at LC-wPBE/6-311++G\*\*

| Coordinate of water molecule |       |       |       |  |
|------------------------------|-------|-------|-------|--|
| Atoms                        | X (Å) | Y (Å) | Z (Å) |  |
| O                            | 0.00  | 0.12  | 0.00  |  |
| H                            | 0.76  | -0.46 | 0.00  |  |
| H                            | -0.76 | -0.46 | 0.00  |  |

**Table S5.** Comparison between absolute Gibbs free energy and change in Gibbs free energy on complex formation. All calculations are reported at MP2/6-311++G(d,p) level of theory. Enthalpy is treated in the same manner.

| Structure | Total Gibbs free Energy (Hartree) | Relative Gibbs free energy (kJ mol <sup>-1</sup> ) | Relative change in Gibbs free energy (kJ mol <sup>-1</sup> ) |
|-----------|-----------------------------------|----------------------------------------------------|--------------------------------------------------------------|
| 2a        | -864.558704                       | 0.0                                                | 0.0                                                          |
| 2b        | -864.553752                       | 13.0                                               | 13.0                                                         |
| 2c        | -864.558469                       | 0.6                                                | -2.9                                                         |
| Structure | Total Enthalpy (Hartree)          | Relative Enthalpy (kJ mol <sup>-1</sup> )          | Relative change in Enthalpy (kJ mol <sup>-1</sup> )          |
| 2a        | -864.558096                       | 0                                                  | 0.0                                                          |
| 2b        | -864.553143                       | 13.0                                               | 13.0                                                         |
| 2c        | -864.55786                        | 0.6                                                | -3.0                                                         |

Table S6. Observed rotational transitions for the HFIP•••H<sub>2</sub>O complex.

| J, K <sub>-1</sub> , K <sub>+1</sub> ← J, K <sub>-1</sub> , K <sub>+1</sub> | Type | Observed (MHz) | Obs-Calc (MHz) |
|-----------------------------------------------------------------------------|------|----------------|----------------|
| 2, 0, 2 ← 1, 1, 1                                                           | b    | 3062.6515      | -0.0029        |
| 2, 1, 2 ← 1, 0, 1                                                           | b    | 3250.3360      | 0.0080         |
| 3, 0, 3 ← 2, 1, 2                                                           | b    | 4556.3460      | 0.0031         |
| 3, 1, 3 ← 2, 0, 2                                                           | b    | 4607.4975      | 0.0089         |
| 4, 0, 4 ← 3, 1, 3                                                           | b    | 5987.3295      | -0.0025        |
| 4, 1, 4 ← 3, 0, 3                                                           | b    | 5996.9975      | -0.0008        |
| 5, 0, 5 ← 4, 1, 4                                                           | b    | 7401.5900      | -0.0005        |
| 5, 1, 5 ← 4, 0, 4                                                           | b    | 7403.1100      | -0.0069        |
| 5, 2, 4 ← 4, 1, 3                                                           | b    | 8139.8660      | 0.0052         |
| 5, 2, 3 ← 4, 3, 2                                                           | b    | 8434.5610      | 0.0015         |
| 4, 4, 1 ← 3, 3, 0                                                           | b    | 8760.1525      | -0.0008        |
| 4, 4, 0 ← 3, 3, 0                                                           | c    | 8799.4635      | -0.0050        |
| 6, 0, 6 ← 5, 1, 5                                                           | b    | 8812.6180      | 0.0044         |
| 6, 1, 6 ← 5, 0, 5                                                           | b    | 8812.8320      | -0.0001        |
| 4, 4, 1 ← 3, 3, 1                                                           | c    | 8852.7780      | -0.0031        |
| 4, 3, 1 ← 3, 2, 2                                                           | b    | 8988.1890      | -0.0072        |
| 5, 3, 3 ← 4, 2, 2                                                           | b    | 9126.4780      | -0.0030        |
| 6, 1, 5 ← 5, 2, 4                                                           | b    | 9507.5520      | -0.0004        |
| 6, 2, 5 ← 5, 1, 4                                                           | b    | 9521.1735      | -0.0104        |
| 6, 2, 4 ← 5, 3, 3                                                           | b    | 10103.4265     | 0.0029         |
| 7, 0, 7 ← 6, 1, 6                                                           | b    | 10223.1295     | -0.0038        |
| 7, 1, 7 ← 6, 0, 6                                                           | b    | 10223.1685     | 0.0058         |
| 5, 4, 2 ← 4, 3, 1                                                           | b    | 10257.7875     | 0.0013         |
| 5, 3, 2 ← 4, 2, 2                                                           | c    | 10264.5755     | -0.0022        |
| 6, 3, 4 ← 5, 2, 3                                                           | b    | 10354.0435     | 0.0022         |
| 5, 2, 3 ← 4, 1, 3                                                           | c    | 10397.9045     | -0.0002        |
| 5, 1, 4 ← 4, 0, 4                                                           | c    | 10516.2925     | 0.0016         |
| 5, 4, 1 ← 4, 3, 1                                                           | c    | 10523.6245     | -0.0001        |
| 5, 2, 4 ← 4, 1, 4                                                           | c    | 10526.5365     | 0.0058         |
| 5, 3, 3 ← 4, 2, 3                                                           | c    | 10539.2920     | 0.0022         |
| 5, 4, 2 ← 4, 3, 2                                                           | c    | 10715.2270     | 0.0041         |
| 7, 1, 6 ← 6, 2, 5                                                           | b    | 10922.3905     | -0.0010        |
| 7, 2, 6 ← 6, 1, 5                                                           | b    | 10924.7730     | -0.0064        |
| 5, 4, 1 ← 4, 3, 2                                                           | b    | 10981.0705     | 0.0064         |
| 5, 5, 1 ← 4, 4, 0                                                           | b    | 11066.9635     | 0.0009         |
| 5, 5, 0 ← 4, 4, 0                                                           | c    | 11081.8605     | 0.0032         |
| 5, 5, 1 ← 4, 4, 1                                                           | c    | 11106.2760     | -0.0018        |
| 5, 5, 0 ← 4, 4, 1                                                           | b    | 11121.1725     | 0.0000         |
| 8, 0, 8 ← 7, 1, 7                                                           | b    | 11633.5880     | 0.0019         |
| 8, 1, 8 ← 7, 0, 7                                                           | b    | 11633.5880     | -0.0019        |
| 7, 3, 4 ← 6, 4, 3                                                           | b    | 12015.0996     | 0.0000         |
| 8, 1, 7 ← 7, 2, 6                                                           | b    | 12333.2535     | 0.0002         |
| 8, 2, 7 ← 7, 1, 6                                                           | b    | 12333.6345     | 0.0016         |
| 9, 0, 9 ← 8, 1, 8                                                           | b    | 13044.0270     | 0.0005         |
| 9, 1, 9 ← 8, 0, 8                                                           | b    | 13044.0270     | 0.0001         |
| 10, 0, 10 ← 9, 1, 9                                                         | b    | 14454.4560     | 0.0002         |
| 10, 1, 10 ← 9, 0, 9                                                         | b    | 14454.4560     | 0.0001         |

Table S7. Observed rotational transitions for the HFIP•••D<sub>2</sub>O complex.

| J, K <sub>-1</sub> , K <sub>+1</sub> ← J, K <sub>-1</sub> , K <sub>+1</sub> | Type | Observed (MHz) | Obs-Calc (MHz) |
|-----------------------------------------------------------------------------|------|----------------|----------------|
| 4, 0, 4 ← 3, 1, 3                                                           | b    | 5810.5170      | -0.0016        |
| 4, 1, 4 ← 3, 0, 3                                                           | b    | 5813.0460      | 0.0010         |
| 5, 0, 5 ← 4, 1, 4                                                           | b    | 7178.7880      | -0.0010        |
| 5, 1, 5 ← 4, 0, 4                                                           | b    | 7179.0490      | -0.0005        |
| 5, 2, 4 ← 4, 1, 3                                                           | b    | 7874.8170      | 0.0069         |
| 6, 0, 6 ← 5, 1, 5                                                           | b    | 8546.1100      | -0.0051        |
| 6, 1, 6 ← 5, 0, 5                                                           | b    | 8546.1390      | -0.0004        |
| 6, 1, 5 ← 5, 2, 4                                                           | b    | 9230.7850      | -0.0027        |
| 6, 2, 5 ← 5, 1, 4                                                           | b    | 9233.1410      | 0.0003         |
| 7, 0, 7 ← 6, 1, 6                                                           | b    | 9913.3510      | 0.0023         |
| 7, 1, 7 ← 6, 0, 6                                                           | b    | 9913.3510      | 0.0001         |
| 8, 0, 8 ← 7, 1, 7                                                           | b    | 11280.5705     | 0.0009         |
| 8, 1, 8 ← 7, 0, 7                                                           | b    | 11280.5705     | 0.0007         |
| 7, 2, 5 ← 6, 3, 4                                                           | b    | 11281.7270     | 0.0030         |
| 7, 3, 5 ← 6, 2, 4                                                           | b    | 11293.4195     | -0.0023        |
| 5, 3, 2 ← 4, 2, 2                                                           | c    | 10083.8165     | 0.0017         |
| 5, 5, 0 ← 4, 4, 1                                                           | b    | 10621.2490     | 0.0046         |
| 7, 1, 6 ← 6, 2, 5                                                           | b    | 10598.5855     | 0.0040         |
| 7, 2, 6 ← 6, 1, 5                                                           | b    | 10598.8510     | 0.0014         |
| 5, 5, 1 ← 4, 4, 0                                                           | b    | 10499.0430     | -0.0003        |
| 5, 1, 4 ← 4, 2, 3                                                           | b    | 7857.0490      | -0.0022        |
| 6, 6, 0 ← 5, 5, 1                                                           | b    | 12739.5975     | -0.0037        |
| 4, 4, 0 ← 3, 3, 1                                                           | b    | 8528.5805      | -0.0061        |
| 9, 0, 9 ← 8, 1, 8                                                           | b    | 12647.7785     | -0.0008        |
| 9, 1, 9 ← 8, 0, 8                                                           | b    | 12647.7785     | -0.0008        |
| 8, 2, 6 ← 7, 3, 5                                                           | b    | 12651.9490     | -0.0068        |
| 8, 3, 6 ← 7, 2, 5                                                           | b    | 12653.5610     | 0.0024         |
| 6, 6, 1 ← 5, 5, 0                                                           | b    | 12679.7318     | 0.0028         |
| 9, 1, 8 ← 8, 2, 7                                                           | b    | 13332.7780     | 0.0019         |
| 9, 2, 8 ← 8, 1, 7                                                           | b    | 13332.7780     | -0.0008        |

**Table S8.** Observed rotational transitions for the HFIP•••HOD complex.

| J, K <sub>-1</sub> , K <sub>+1</sub> <- J, K <sub>-1</sub> , K <sub>+1</sub> | Type | Observed (MHz) | Obs-Calc (MHz) |
|------------------------------------------------------------------------------|------|----------------|----------------|
| 4, 0, 4 <- 3, 1, 3                                                           | b    | 5917.0530      | -0.0002        |
| 4, 1, 4 <- 3, 0, 3                                                           | b    | 5923.2175      | 0.0042         |
| 5, 0, 5 <- 4, 1, 4                                                           | b    | 7312.9070      | 0.0022         |
| 5, 2, 4 <- 4, 1, 3                                                           | b    | 8030.5025      | -0.0001        |
| 4, 4, 1 <- 3, 3, 1                                                           | c    | 8684.1000      | 0.0038         |
| 6, 0, 6 <- 5, 1, 5                                                           | b    | 8706.6000      | -0.0009        |
| 6, 1, 6 <- 5, 0, 5                                                           | b    | 8706.7025      | -0.0031        |
| 4, 4, 0 <- 3, 3, 1                                                           | b    | 8735.5610      | -0.0062        |
| 6, 1, 5 <- 5, 2, 4                                                           | b    | 9396.5805      | 0.0006         |
| 6, 2, 5 <- 5, 1, 4                                                           | b    | 9404.1610      | 0.0034         |
| 7, 0, 7 <- 6, 1, 6                                                           | b    | 10100.0100     | 0.0001         |
| 7, 1, 7 <- 6, 0, 6                                                           | b    | 10100.0100     | -0.0121        |
| 6, 3, 4 <- 5, 2, 3                                                           | b    | 10187.6340     | -0.0005        |
| 7, 1, 6 <- 6, 2, 5                                                           | b    | 10792.2780     | 0.0028         |
| 7, 2, 6 <- 6, 1, 5                                                           | b    | 10793.4310     | 0.0067         |
| 5, 5, 1 <- 4, 4, 0                                                           | b    | 10836.4875     | 0.0038         |
| 5, 5, 0 <- 4, 4, 0                                                           | c    | 10858.0510     | 0.0002         |
| 5, 4, 1 <- 4, 3, 2                                                           | b    | 10878.3150     | 0.0003         |
| 5, 5, 1 <- 4, 4, 1                                                           | c    | 10887.9485     | -0.0062        |
| 5, 5, 0 <- 4, 4, 1                                                           | b    | 10909.5245     | 0.0027         |
| 8, 0, 8 <- 7, 1, 7                                                           | b    | 11493.3855     | 0.0019         |
| 8, 1, 8 <- 7, 0, 7                                                           | b    | 11493.3855     | 0.0006         |
| 9, 1, 9 <- 8, 0, 8                                                           | b    | 12886.7470     | 0.0016         |
| 9, 0, 9 <- 8, 1, 8                                                           | b    | 12886.7470     | 0.0018         |
| 9, 2, 7 <- 8, 3, 6                                                           | b    | 14272.7320     | -0.0031        |
| 9, 3, 7 <- 8, 2, 6                                                           | b    | 14273.8295     | -0.0006        |
| 10, 1, 10 <- 9, 0, 9                                                         | b    | 14280.0900     | -0.0026        |
| 10, 0, 10 <- 9, 1, 9                                                         | b    | 14280.0900     | -0.0026        |
| 10, 1, 9 <- 9, 2, 8                                                          | b    | 14972.0880     | -0.0008        |
| 10, 2, 9 <- 9, 1, 8                                                          | b    | 14972.0880     | -0.0033        |
| 7, 7, 1 <- 6, 6, 0                                                           | b    | 15308.1415     | -0.0023        |
| 7, 7, 0 <- 6, 6, 0                                                           | c    | 15311.2610     | -0.0075        |
| 7, 7, 1 <- 6, 6, 1                                                           | c    | 15316.5590     | 0.0066         |
| 7, 7, 0 <- 6, 6, 1                                                           | b    | 15319.6805     | 0.0033         |
| 10, 3, 8 <- 9, 2, 7                                                          | b    | 15665.6685     | 0.0024         |
| 11, 0, 11 <- 10, 1, 10                                                       | b    | 15673.4240     | 0.0024         |
| 11, 1, 11 <- 10, 0, 10                                                       | b    | 15673.4240     | 0.0024         |

**Table S9.** Observed rotational transitions for the HFIP(OD)•••H<sub>2</sub>O complex.

| J, K <sub>-1</sub> , K <sub>+1</sub> <- J, K <sub>-1</sub> , K <sub>+1</sub> | Type | Observed (MHz) | Obs-Calc (MHz) |
|------------------------------------------------------------------------------|------|----------------|----------------|
| 4, 0, 4 <- 3, 1, 3                                                           | b    | 5966.1830      | 0.0030         |
| 4, 1, 4 <- 3, 0, 3                                                           | b    | 5974.6100      | 0.0017         |
| 5, 0, 5 <- 4, 1, 4                                                           | b    | 7374.9050      | -0.0061        |
| 5, 1, 5 <- 4, 0, 4                                                           | b    | 7376.1780      | -0.0048        |
| 6, 0, 6 <- 5, 1, 5                                                           | b    | 8780.7740      | 0.0024         |
| 6, 1, 6 <- 5, 0, 5                                                           | b    | 8780.9500      | 0.0049         |
| 5, 5, 1 <- 4, 4, 0                                                           | b    | 10989.2730     | 0.0001         |
| 5, 5, 0 <- 4, 4, 1                                                           | b    | 11048.6365     | -0.0001        |
| 8, 1, 8 <- 7, 0, 7                                                           | b    | 11591.5830     | -0.0018        |
| 8, 0, 8 <- 7, 1, 7                                                           | b    | 11591.5830     | 0.0009         |
